# Supplementary material for: Current Trends in Inpatient Care and In-Hospital Mortality of Cholangiocarcinoma in Germany: A Systematic Analysis between 2010 and 2019
Source: Cancers (Basel). 2022 Aug 21;14(16):4038. doi: 10.3390/cancers14164038 (PMC9406726; doi:10.3390/cancers14164038)
Supplement: Supplementary file 1 [file cancers-14-04038-s001.zip › cancers-1825733-supplementary.pdf]

## Supplementary Figure Legends

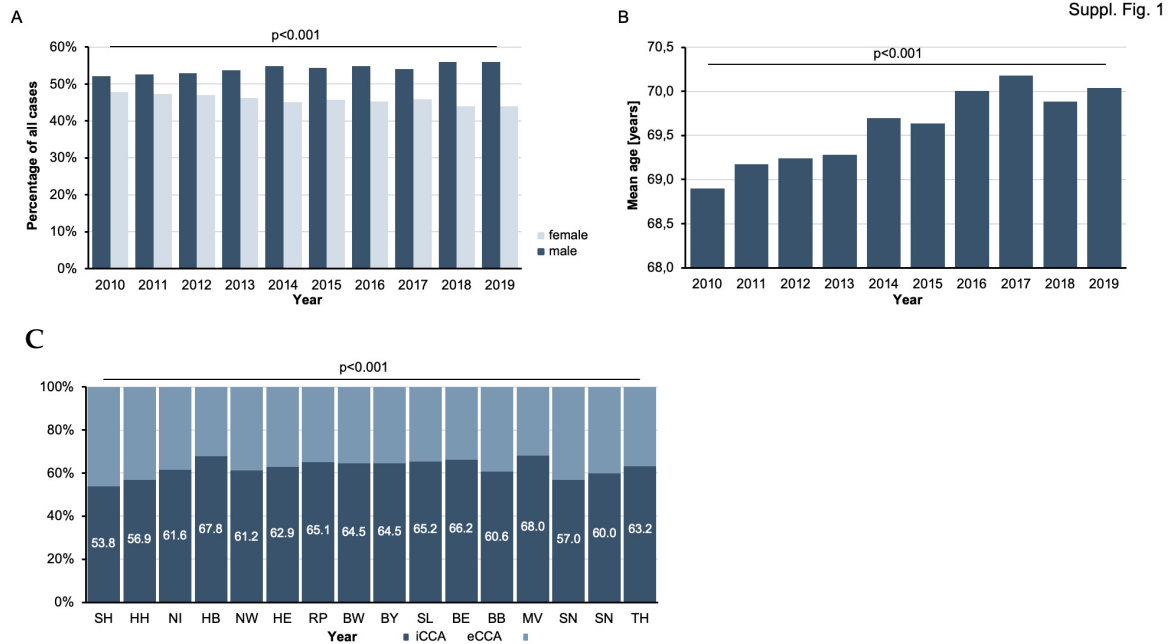

**Supplementary Figure S1:** (A) The percentage of male CCA patients significantly increases over time. (B) The mean CCA patients' age significantly increases over time. (C) There is a significant difference regarding the distribution of iCCA and eCCA between the different German federal states (BB: Brandenburg, BE: Berlin, BW: Baden-Württemberg, BY: Bavaria, HE: Hesse, HB: Bremen, HH: Hamburg, MV: Mecklenburg-Western Pomerania, NI: Lower Saxony, NW: North Rhine-Westphalia, RP: Rhineland-Palatinate, SH: Schleswig-Holstein, SL: Saarland, SN: Saxony, ST: Saxony-Anhalt, TH: Thuringia).

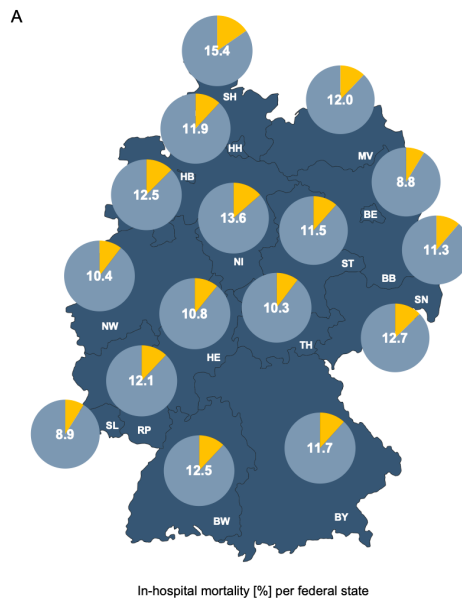

**Supplementary Figure S2:** (A) In-hospital mortality significantly differs between geographical regions and ranges from 8.9% in Saarland to 13.6% in Lower-Saxony (BB: Brandenburg, BE: Berlin, BW: Baden-Württemberg, BY: Bavaria, HE: Hesse, HB: Bremen, HH: Hamburg, MV: Mecklenburg-

Western Pomerania, NI: Lower Saxony, NW: North Rhine-Westphalia, RP: Rhineland-Palatinate, SH: Schleswig-Holstein, SL: Saarland, SN: Saxony, ST: Saxony-Anhalt, TH: Thuringia).

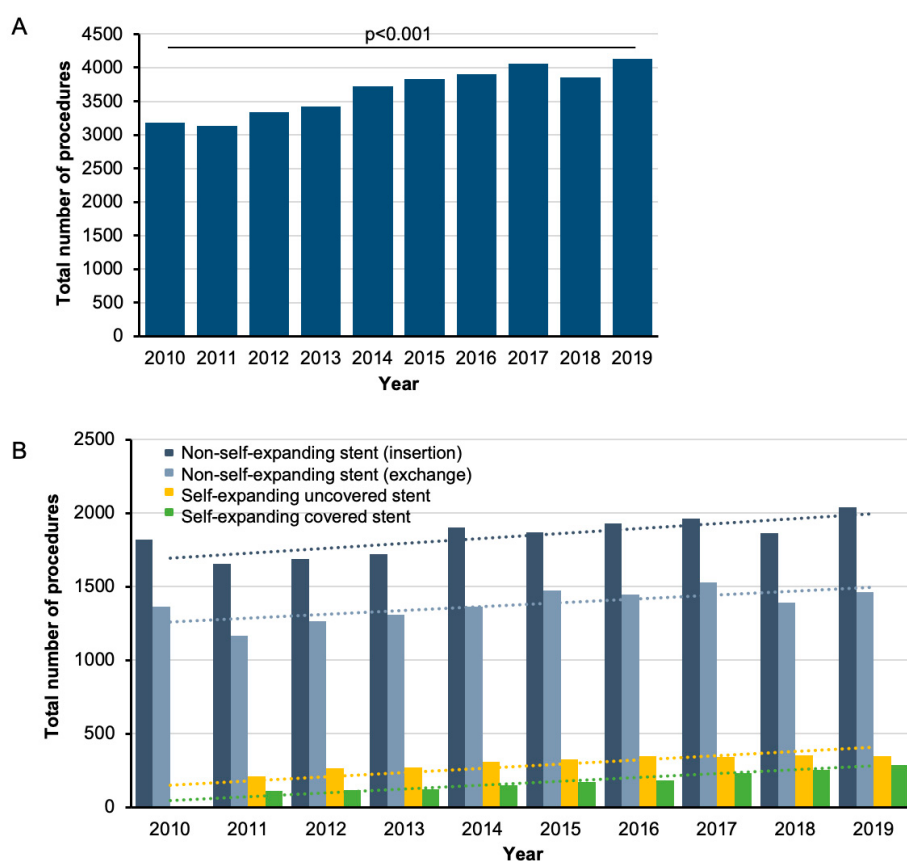

**Supplementary Figure S3:** (A) The total number of CCA patients receiving stent insertion or exchange during significantly increased between 2010 and 2019. (B) There is a significant increase in all groups of stent types, although the percentage increase in uncovered SEMS was highest.

**Supplementary Table S1.** Detailed description of study population from 2010 to 2019.

|                                      | 2010   | 2011   | 2012   | 2013   | 2014   | 2015   | 2016   | 2017   | 2018   | 2019   |
|--------------------------------------|--------|--------|--------|--------|--------|--------|--------|--------|--------|--------|
| <b>Total number of CCA cases</b>     | 13,680 | 13,611 | 14,453 | 14,331 | 15,069 | 15,802 | 16,245 | 16,909 | 16,552 | 17,863 |
| In-hospital death [total]            | 1,598  | 1,608  | 1,660  | 1,657  | 1,666  | 1,681  | 1,779  | 1,971  | 1,894  | 2,026  |
| In-hospital mortality rate [%]       | 11.68  | 11.81  | 11.49  | 11.56  | 11.06  | 10.64  | 10.95  | 11.67  | 11.44  | 11.34  |
| <b>Sex [total]</b>                   |        |        |        |        |        |        |        |        |        |        |
| Male                                 | 7,136  | 7,164  | 7,654  | 7,703  | 8,279  | 8,583  | 8,903  | 91,35  | 9,276  | 10,008 |
| Female                               | 6,544  | 6,447  | 6,799  | 6,628  | 6,790  | 7,219  | 7,342  | 7,774  | 7,276  | 7,855  |
| Age [years, mean]                    | 68.90  | 69.17  | 69.24  | 69.28  | 69.69  | 69.64  | 70.00  | 70.18  | 69.89  | 70.04  |
| <b>CCA Location [total]</b>          |        |        |        |        |        |        |        |        |        |        |
| Intrahepatic                         | 9,293  | 8,457  | 8,550  | 8,868  | 9,399  | 9,886  | 10,134 | 10,324 | 10,364 | 11,356 |
| Extrahepatic                         | 4,387  | 5,154  | 5,903  | 5,463  | 5,670  | 5,916  | 6,111  | 6,585  | 6,188  | 6,507  |
| <b>Treatment [total]</b>             |        |        |        |        |        |        |        |        |        |        |
| CTX                                  | 3,169  | 3,311  | 3,560  | 3,413  | 3,563  | 3,745  | 3,843  | 3,873  | 3,732  | 4,024  |
| PDT                                  | 179    | 132    | 91     | 80     | 71     | 61     | 56     | 51     | 50     | 55     |
| Radiation                            | 188    | 166    | 193    | 215    | 240    | 193    | 215    | 207    | 209    | 198    |
| RFA                                  | 0      | 0      | 0      | 0      | 129    | 202    | 205    | 195    | 201    | 220    |
| SIRT                                 | 41     | 33     | 120    | 93     | 120    | 127    | 148    | 164    | 162    | 141    |
| Surgery                              | 743    | 765    | 894    | 896    | 919    | 934    | 1,021  | 1,055  | 1,000  | 1,039  |
| TACE                                 | 180    | 178    | 170    | 144    | 222    | 260    | 286    | 216    | 218    | 213    |
| Non-self-expanding stent (insertion) | 1,817  | 1,652  | 1,689  | 1,718  | 1,902  | 1,867  | 1,931  | 1,961  | 1,864  | 2,041  |
| Non-self-expanding stent (exchange)  | 1,363  | 1,166  | 1,263  | 1,308  | 1,364  | 1,472  | 1,446  | 1,529  | 1,391  | 1,463  |
| Self-expanding uncovered stent       | 0      | 209    | 264    | 269    | 306    | 323    | 346    | 340    | 353    | 346    |
| Self-expanding covered stent         | 0      | 110    | 117    | 122    | 146    | 170    | 179    | 230    | 252    | 287    |
